# Supplementary material for: Canonical Wnt signaling activation by chimeric antigen receptors for efficient cardiac differentiation from mouse embryonic stem cells
Source: PubMed Central journal article supplement (PMC9912504; doi:10.1186/s41232-023-00258-6), 2023-02-10
Supplement: 41232_2023_258_MOESM1_ESM.pdf [file 41232_2023_258_MOESM1_ESM.pdf]

## **Supplemental Information**

### **Canonical Wnt signaling activation by chimeric antigen receptors for efficient cardiac differentiation from mouse embryonic stem cells**

Takahiro Sogo, Tasuku Tsukamoto, Shu Nakao, Yukihiro Harada, Dai Ihara, Tomoe Ueyama, Tomoaki Ishida, Masato Nakahara, Koji Hasegawa, Yuka Akagi, Yasuyuki S Kida, Osamu Nakagawa, Teruyuki Nagamine, Masahiro Kawahara, Teruhisa Kawamura

Fig. S1

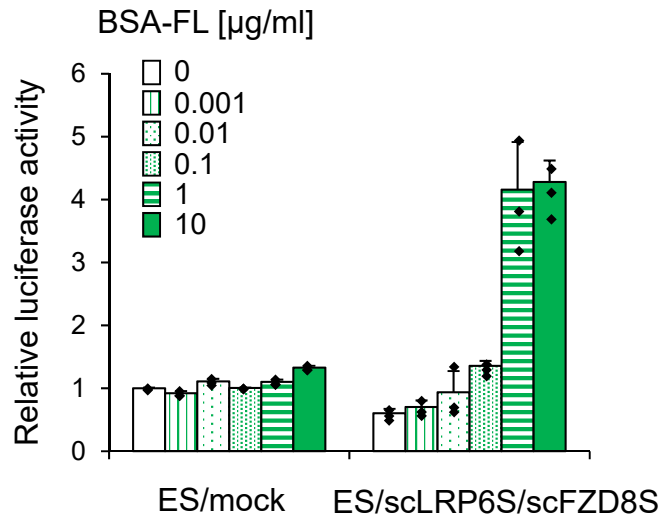

**Fig. S1. TCF/ $\beta$ -catenin-dependent transcriptional activities of mouse ES cells stably expressing scLRP6S and scFz8S.**

TCF/ $\beta$ -catenin-dependent luciferase activities in ES/mock and ES/scLRP6S/scFZD8S following stimulation with BSA-FL are shown. Luciferase luminescence intensities were normalized to Renilla luciferase luminescence intensities derived from co-transfected pSV40-Rluc. The values of mock-transduced cells treated with vehicle were set to 1. The data represent the mean and standard deviation from 3 independent experiments.

Fig. S2

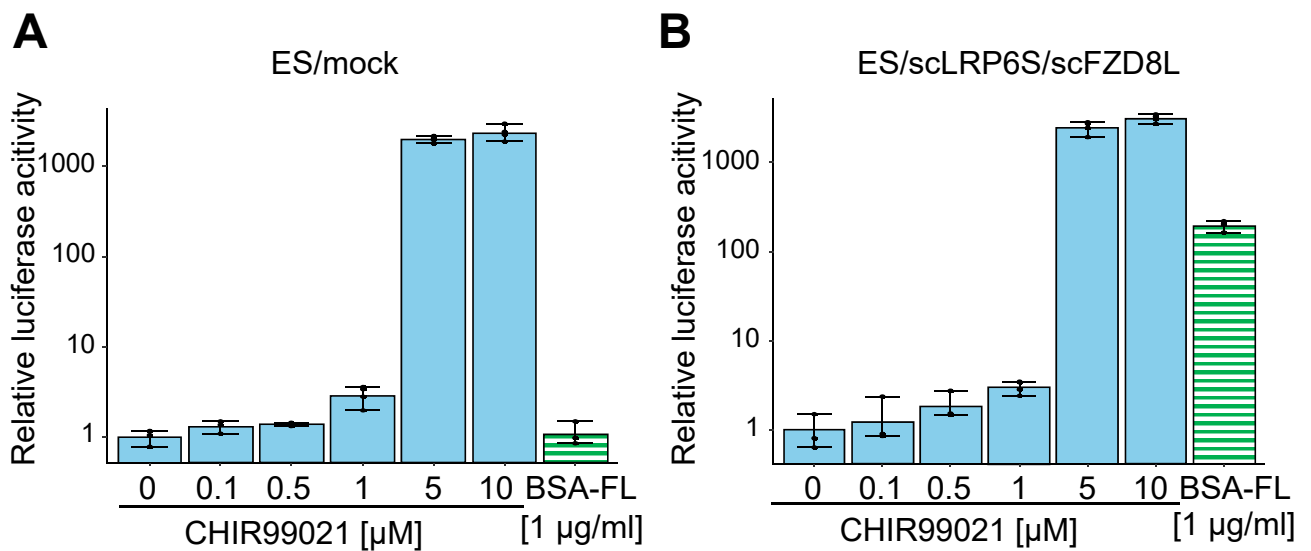

**Fig. S2. TCF/ $\beta$ -catenin-dependent transcriptional activities in mouse ES cells stably expressing scLRP6S and scFZD8L.**

TCF/ $\beta$ -catenin-dependent luciferase activities in ES/mock and ES/scLRP6S/scFZD8L following stimulation with CHIR99021 (a WNT activator) or BSA-FL at indicated concentrations are shown. Luciferase luminescence intensities were normalized to Renilla luciferase luminescence intensities derived from co-transfected pSV40-Rluc. The values of mock-transduced cells treated with vehicle were set to 1. The data represent the mean and standard deviation.

Fig. S3

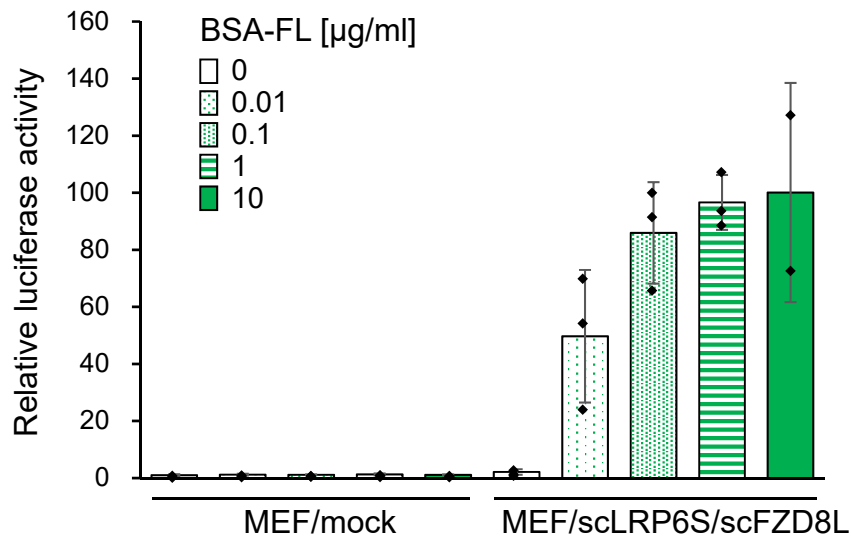

**Fig. S3. TCF/ $\beta$ -catenin-dependent transcriptional activities of mouse embryonic fibroblasts (MEFs) expressing scLRP6S and scFZD8L.**

TCF/ $\beta$ -catenin-dependent luciferase activities in MEFs expressing mock or scLRP6S/scFZD8L following stimulation with BSA-FL at the indicated concentrations are shown. Luciferase luminescence intensities were normalized to Renilla luciferase luminescence intensities derived from co-transfected pSV40-Rluc. The values of mock-transduced cells treated with vehicle were set to 1. The data represent the mean and standard deviation from triplicates.

Fig. S4

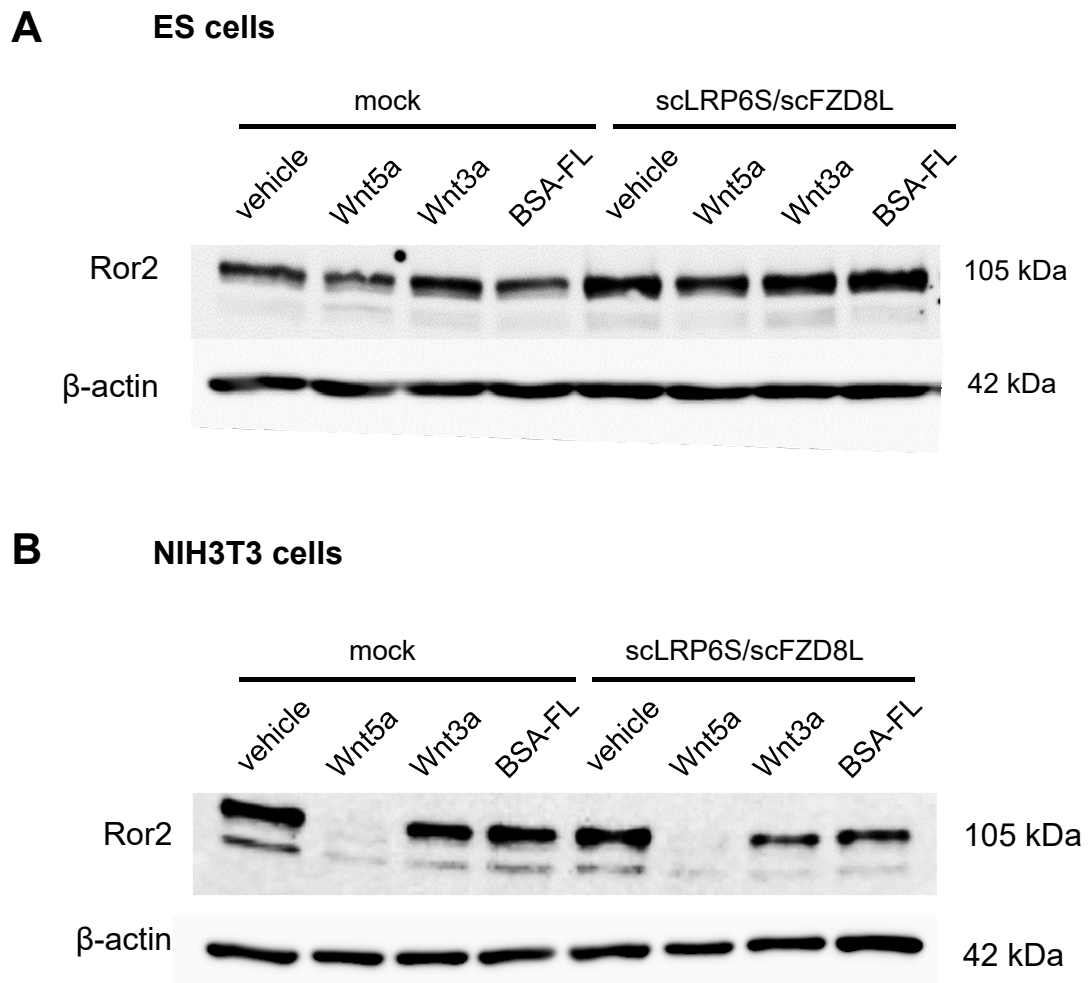

**Fig. S4. Western blotting for non-canonical Wnt activation in scLRP6S and scFZD8L-expressing cells.**

Protein expression levels of Ror2 and  $\beta$ -actin in mock- or scLRP6S/scFZD8L-expressing ES cells (A) or NIH3T3 cells (B) treated with **Wnt5a**, **Wnt3a** or **BSA-FL** are shown.

Fig. S5

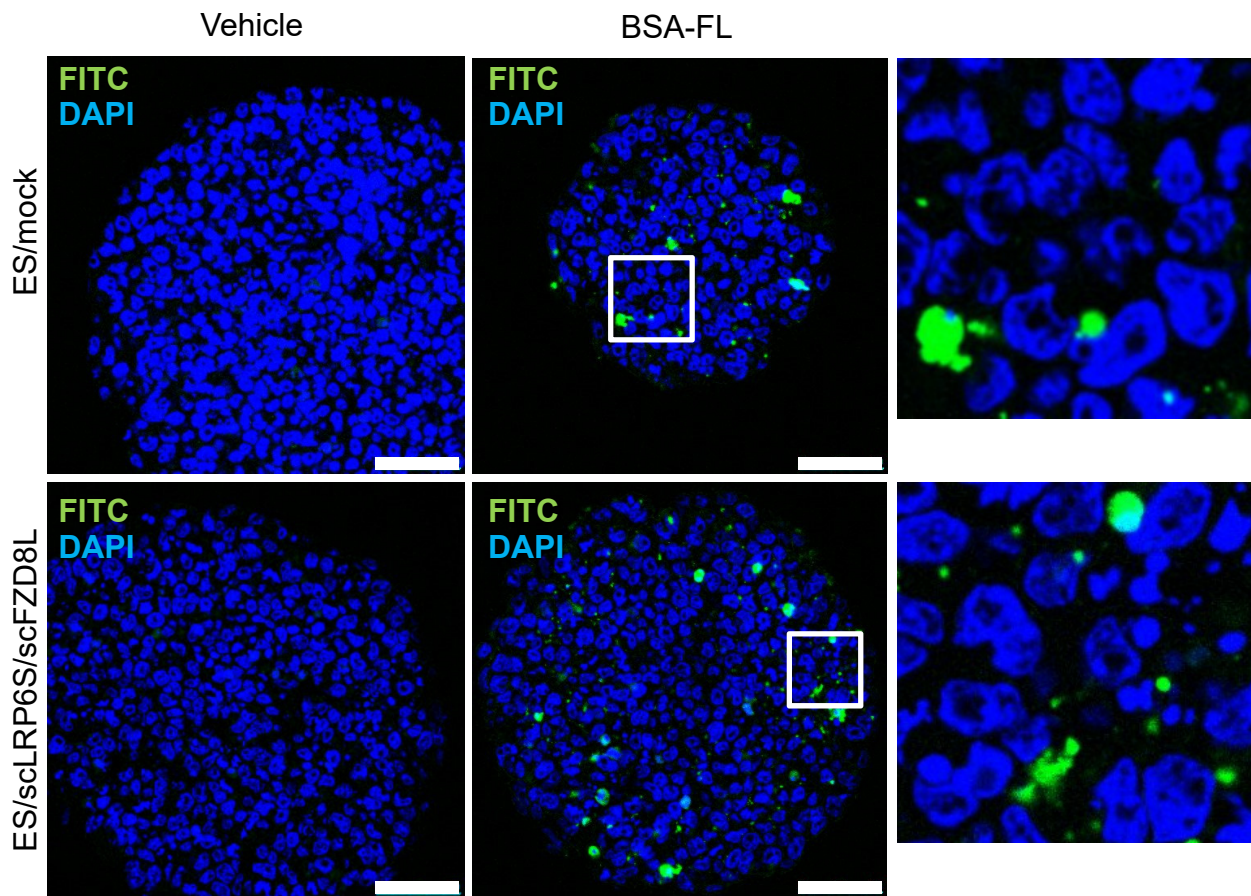

**Fig. S5. BSA-FL is diffused into EBs.**

Representative fluorescence microscopy images in EB sections from ES/mock and ES/scLRP6S/scFZD8L treated with vehicle or BSA-FL. Nuclei are counterstained with DAPI showing BSA-FL deposition possibly in the plasma membrane. The right panels are enlarged images of the boxed area of the BSA-FL-treated EBs. Scale bars = 50  $\mu$ m.

Fig. S6

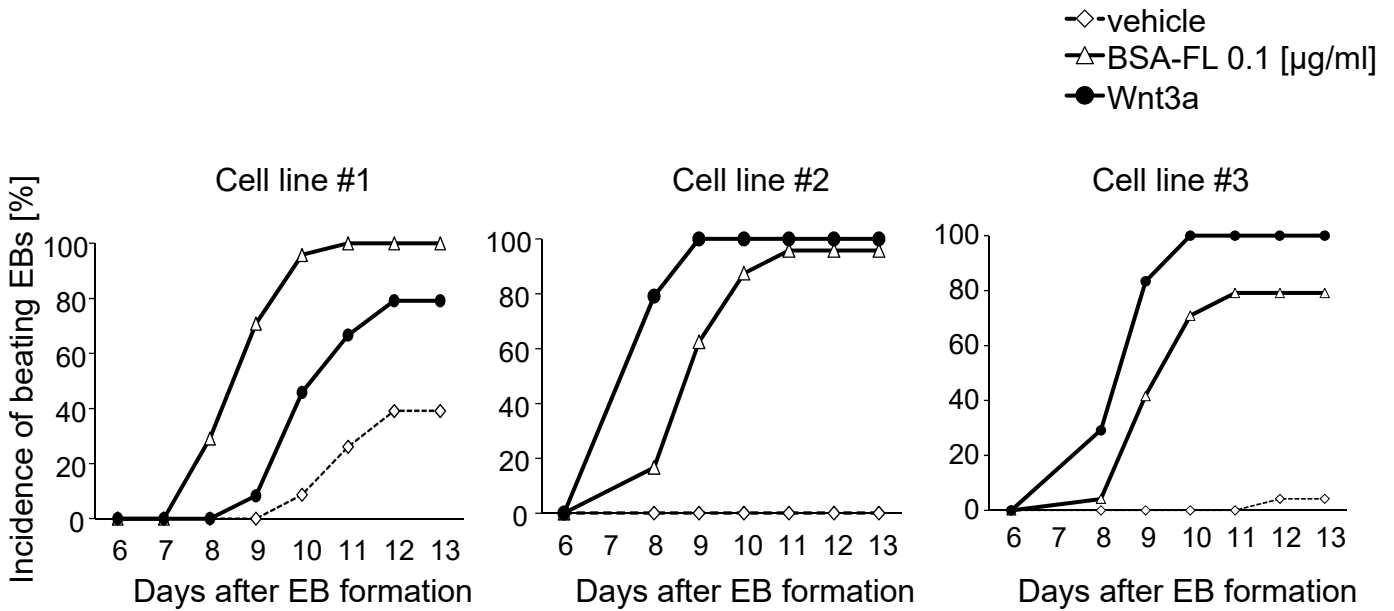

**Fig. S6. The incidence of spontaneously beating EBs derived from three independent ES cell lines expressing scLRP6S and scFZD8L.**

The incidence of spontaneously beating EBs stimulated by 0.1 μg/ml BSA-FL, 50 ng/ml Wnt3a, or vehicle for 24 hours from day 2 of differentiation is shown.

Fig. S7

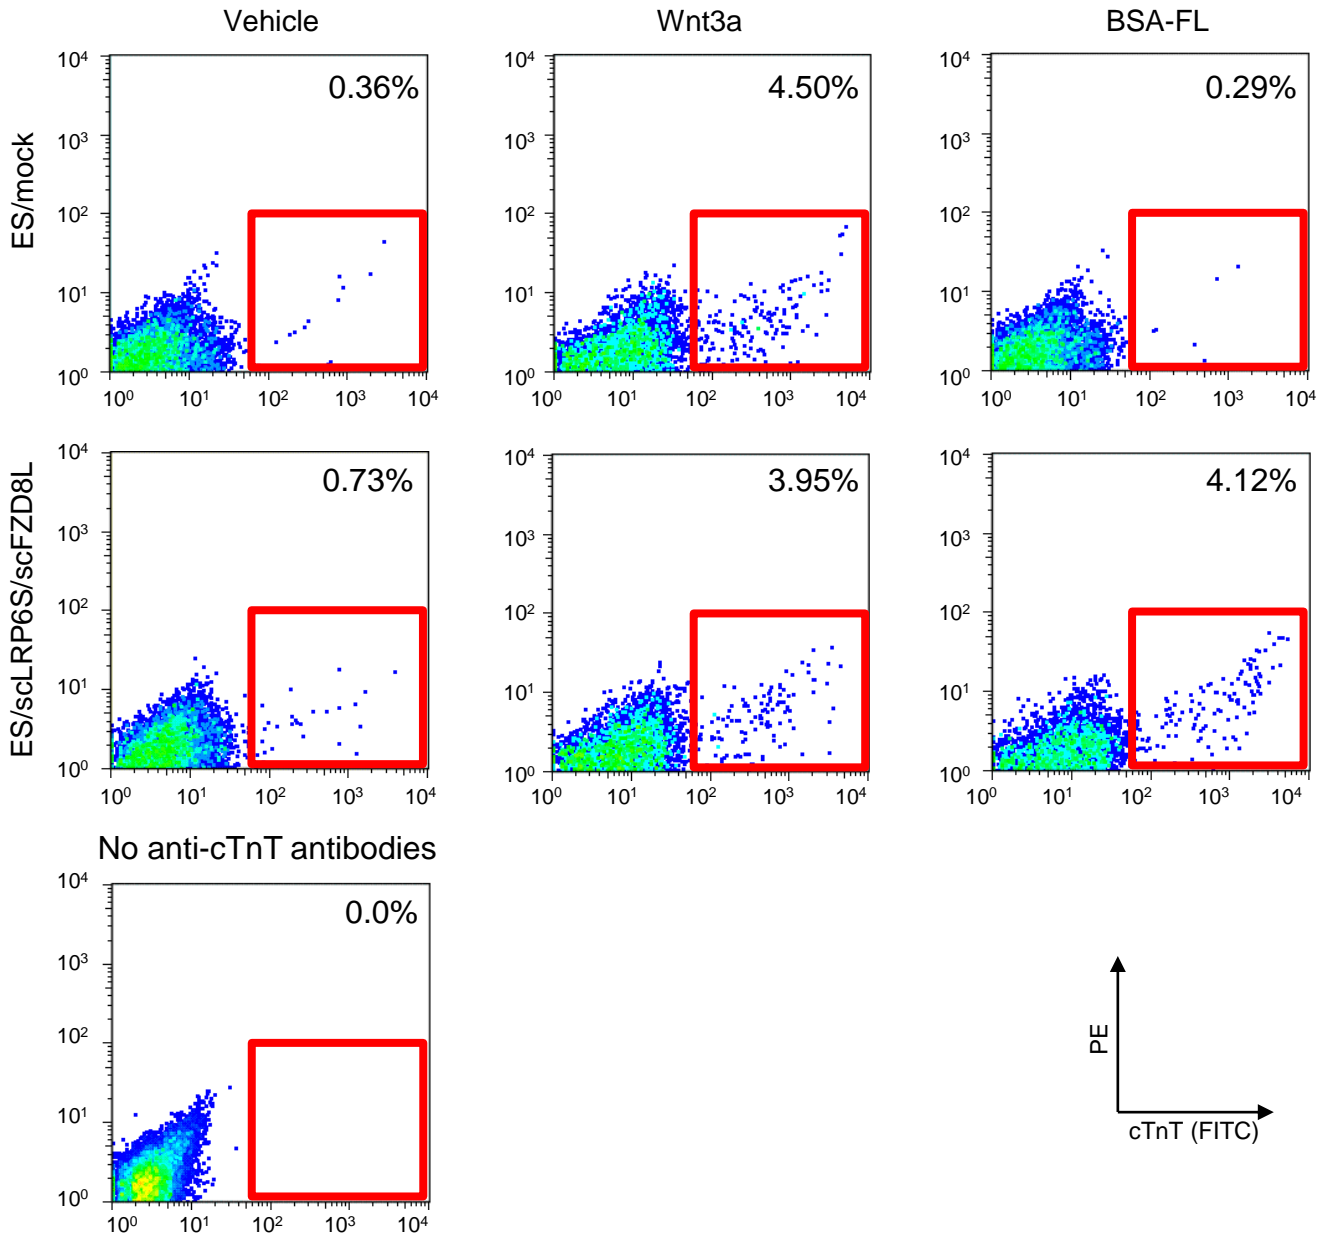

**Fig. S7. BSA-FL enhances cardiac differentiation of EBs expressing scLRP6S and scFZD8L.**

Representative flow cytometry plots of cardiac troponin T (cTnT, indicated by FITC) vs. phycoerythrin (PE) for differentiated ES/mock and ES/scLRP6S/scFZD8L treated with vehicle, Wnt3a or BSA-FL.



Fig. S8

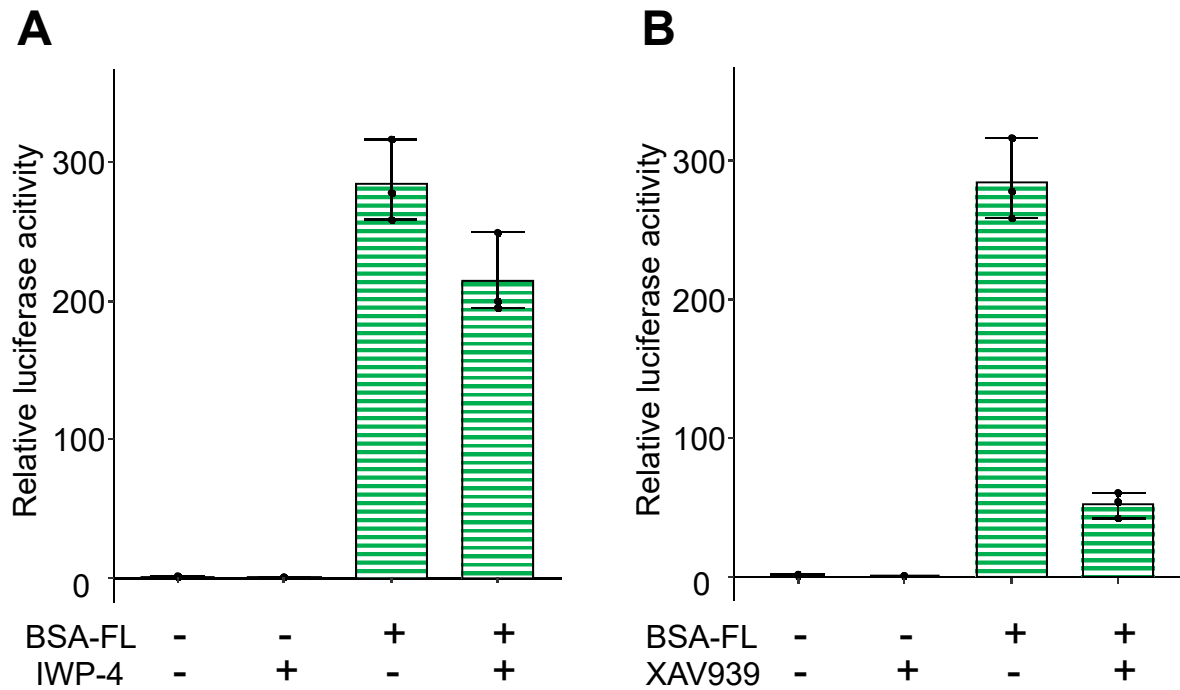

**Fig. S8. TCF/ $\beta$ -catenin-dependent transcriptional activities in mouse ES cells stably expressing scLRP6S and scFZD8L.**

TCF/ $\beta$ -catenin-dependent luciferase activities in ES/mock and

ES/scLRP6S/scFZD8L following BSA-FL treatment with or without IWP-4 or

XAV939, WNT inhibitors, are shown. Luciferase luminescence intensities were

normalized to Renilla luciferase luminescence intensities derived from co-transfected

pSV40-Rluc. The values of mock-transduced cells treated with vehicle were set to 1.

The data represent the mean and standard deviation.

Fig. S9

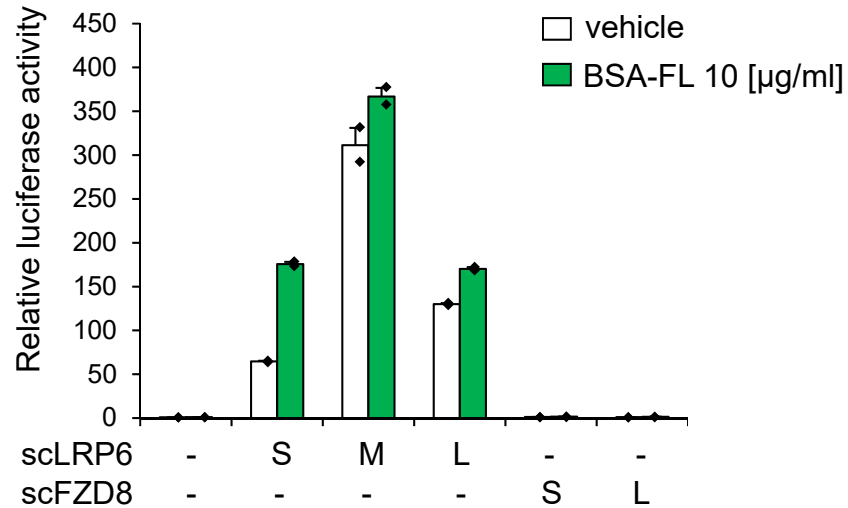

**Fig. S9. TCF/ $\beta$ -catenin-dependent transcriptional activities in mouse ES cells expressing single chimeric receptors.**

TCF/ $\beta$ -catenin-dependent transcriptional activities measured by luciferase reporter assay in mouse ES cells transiently transfected with plasmids encoding various chimeric LRP6 or FZD8. The values in mock-transfected cells treated with vehicle were set to 1. The data represent the mean of duplicates and standard deviation from one representative experiment.

Fig. S10

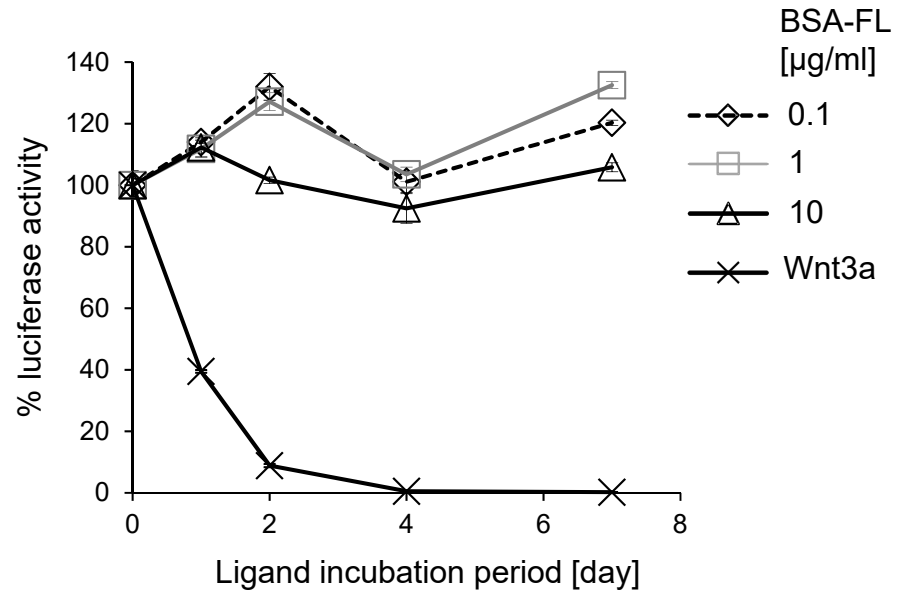

**Fig. S10. Activity of BSA-FL and Wnt3a after incubation at 37 ° C .**

TCF-dependent transcriptional activities were measured by luciferase reporter assay in mouse ES cells transiently transfected with scLRP6S and scFZD8L. The cells were stimulated with 0.1, 1, or 10 µg/ml BSA-FL or 50 ng/ml Wnt3a that were incubated at 37 ° C for 0, 1, 2, 4, or 7 days.

Luciferase activities of samples stimulated by each ligand with no incubation were set to 100.

Fig. S11

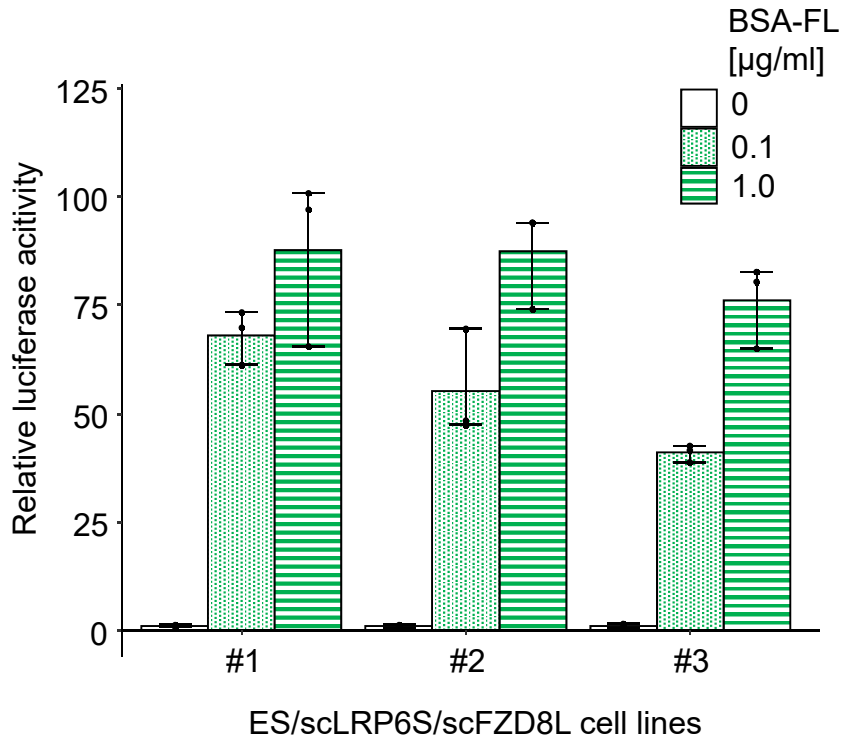

**Fig. S11. TCF/ $\beta$ -catenin-dependent transcriptional activities in three independent mouse ES cell lines stably expressing scLRP6S and scFZD8L.**

TCF/ $\beta$ -catenin-dependent luciferase activities in ES/scLRP6S/scFZD8L following indicated BSA-FL treatment are shown. Luciferase luminescence intensities were normalized to Renilla luciferase luminescence intensities derived from co-transfected pSV40-Rluc. The data represent the mean and standard deviation.

Table S1. List of primer sequences used for plasmid construction.

| Primer name | Forward primer (5' to 3')               | Reverse primer (5' to 3')             |
|-------------|-----------------------------------------|---------------------------------------|
| scFv        | GCCTTCGAAACCATGGGATGG<br>AGCTGTATC      | GCCGATATCCGGAACCTGCAGTCAAGAG          |
| LRP6L       | CGGTCCCCGAGGCTTTCCTTCT<br>G             | TCAGGAGGAGTCCGTGCAGGG                 |
| LRP6M       | CGACGTGTTCTCCTCAGCAGT<br>TTACC          | TCAGGAGGAGTCCGTGCAGGG                 |
| LRP6S       | GCCACCGGTACCAACACAGTT<br>GGTTCTGTTATTGG | GCCACCGGTCAGGAGGAGTCCGTGCAGG<br>G     |
| FZD8L       | CGAACCGCACCGACCTCACCA<br>CG             | TCAGACCTGGGACAATGGCATTGTC             |
| FZD8S       | GCCACCGGTTTCACCGTCTTCT<br>GGATCGG       | GCCACCGGTCAGACCTGGGACAATGGCAT<br>TTGC |

Table S2. List of primer sequences used for quantitative RT-PCR.

| Gene           | Forward primer (5' to 3') | Reverse primer (5' to 3')   |
|----------------|---------------------------|-----------------------------|
| <i>Gapdh</i>   | AGGTCGGTGTGAACGGATTTG     | TGTAGACCATGTAGTTGAGGTCA     |
| <i>Axin2</i>   | TGACTCTCCTTCCAGATCCCA     | TGCCACACTAGGCTGACA          |
| <i>EphA1</i>   | CCGAGGAAGTCACTCTAATGGA    | GGGGTGTCCCGTTTAGCAT         |
| <i>Fgf8</i>    | GAGACCGATACTTTTGGAAGCA    | TCTCTGTGAATACGCAGTCCT       |
| <i>Fst</i>     | GAGCAAGGAAGAGTGTTCAG      | CTCACACGTTTCTTTACAAGGGA     |
| <i>Wnt8a</i>   | TCCAGACTCTTCGTGGACAGT     | CAGGTCCTTTTCGTGGAGGC        |
| <i>Gata4</i>   | CGCCGTTTTCTGGGAA          | CACCGGCTAAAGAAGCCTA         |
| <i>Isl1</i>    | GGAAGAAACCAGCCTCAGTG      | AGGATGGGAGGAGAGGCAA         |
| <i>Mesp1</i>   | CTACCCTAGACCCCGAGTC       | CGGCGTCCAGGTTTCTAG          |
| <i>Gata6</i>   | ACCAGCAGCGACTAGCA         | GGCGTACTCCAACCTGA           |
| <i>Flkl</i>    | GGCGGTGGTGACAGTATCTT      | CTCGGTGATGTACACGATGC        |
| <i>Sox17</i>   | GCTCCTGCTTTTGGTGTAGC      | GTCCTTGGGCAGTCATTCAT        |
| <i>Myh7</i>    | CTACAGGCCTGGGCTTACCT      | TCTCCTTCTCAGACTTCCGC        |
| <i>Myh6</i>    | GAGATTTCTCCAACCCAG        | TCTGACTTTCGGAGGTACT         |
| <i>Actc1</i>   | CCAGCCCAGCTGAATCC         | CCATTGTCACACACCAAAGC        |
| <i>Cdh5</i>    | AGACACCCCAACATGCTAC       | GCAAACCTCTCCTTGGAGCAC       |
| <i>Cata3</i>   | CTCGGCCATTCGTACATGGAA     | GGATACCTCTGCACCGTAGC        |
| <i>Acta2</i>   | CTGACAGAGGCACCACTGAA      | AGAGGCATAGAGGGACAGCA        |
| <i>Gata1</i>   | AGCATCAGCACTGGCCTACT      | AGGCCCAGCTAGCATAAGGT        |
| <i>Osx</i>     | ATGGCGTCCTCTCTGCTTG       | TGAAAGGTCAGCGTATGGCTT       |
| <i>Runx2</i>   | CGGCCCTCCCTGAACCTCT       | TGCCTGCCTGGGATCTGTA         |
| <i>Afp</i>     | TCCAGAAGGAAGAGTGGACAA     | GCAGACTAGGAGAAGAGAAATAGTTGA |
| <i>Pdx1</i>    | CCCCAGTTTACAAGCTCGCT      | CTCGGTTCCATTCCGGGAAAGG      |
| <i>Pax6</i>    | AAGGAGGGGGAGAGAACACC      | TCTGAGCTTCATCCGAGTCTT       |
| <i>Nestin</i>  | CCCTGAAGTCGAGGAGCTG       | CTGCTGCACCTCTAAGCGA         |
| <i>Neurod1</i> | ATGACCAAATCATACAGCGAGAG   | TCTGCCTCGTTCCTCGT           |
